# Supplementary material
Source: MDPI journal article supplement (https://www.mdpi.com/1996-1073/14/9/2436)
Supplement: s1 [file s1]

# Supplementary Materials

**Table S1.** The various BET surface area data of N-doped carbon materials for LIBs.

| Electrode                         | BET<br>Surface Area<br>(m <sup>2</sup> g <sup>-1</sup> ) | Reference |
|-----------------------------------|----------------------------------------------------------|-----------|
| Graphene/N-doped carbon           | 327                                                      | [1]       |
| N-doped carbon nanofiber          | 34.5                                                     | [2]       |
| N-doped carbon nanofiber aerogels | 696                                                      | [3]       |
| N-doped graphene sheet            | 398                                                      | [4]       |
| Porous N-doped carbon             | 85                                                       | [5]       |
| HSNC                              | 437.96                                                   | This work |

**Table S2.** The various cycling performance of N-doped carbon materials for LIBs.

| Electrode                         | Voltage<br>Range<br>(V) | Current Density<br>(mA g <sup>-1</sup> ) | Reversible<br>Capacity<br>(mAh g <sup>-1</sup> ) | Cycle<br>Number | Ref.      |
|-----------------------------------|-------------------------|------------------------------------------|--------------------------------------------------|-----------------|-----------|
| Graphene/N-doped carbon           | 0.003–3.0               | 100                                      | 669                                              | 200             | [1]       |
| N-doped carbon nanofiber          | 0.01–3                  | 100                                      | 411.9                                            | 160             | [2]       |
| N-doped carbon nanofiber aerogels | 0.01–3                  | 1000                                     | 611                                              | 1000            | [3]       |
| N-doped graphene sheet            | 0.05–3                  | 100                                      | 1050.4                                           | 190             | [4]       |
| Porous N-doped carbon             | 0.01–1.5                | 500                                      | 476.7                                            | 700             | [5]       |
| N-doped 3D porous carbon          | 0.001–3                 | 200                                      | 555                                              | 100             | [6]       |
| N-doped carbon aerogels           | 0.01–3.0                | 100                                      | 550                                              | 300             | [7]       |
| N-doped graphene-carbon nanofiber | 0.001–3.0               | 200                                      | 226                                              | 150             | [8]       |
| N-rich porous carbon              | 0.01–3.0                | 100                                      | 1181                                             | 100             | [9]       |
| HSNC                              | 0.01–3.0                | 200<br>1000                              | 1398.3<br>455.7                                  | 100<br>200      | This work |

**Table S3.** The fitting parameters for EIS spectra of NC and HSNC samples in LIBs. (The resistance of electrolyte ( $R_s$ ), resistance of SEI layers ( $R_i$ ), charge transfer resistance ( $R_{ct}$ ), Warburg resistance ( $W_o$ ), capacitance on the surface layer (C), and double-layer capacitance (Q) at the interface between the electrode and electrolytes).

| Circuit Elements      | OCV                    |                        |
|-----------------------|------------------------|------------------------|
|                       | NC                     | HSNC                   |
| $R_s$ ( $\Omega$ )    | $2.22 \times 10^{-16}$ | $2.22 \times 10^{-16}$ |
| $CPE_b$ (F)           | 0.5                    | 0.89                   |
| $R_{ct}$ ( $\Omega$ ) | 505.81                 | 115.54                 |
| $CPE_{dl}$ (F)        | 0.71                   | 0.34                   |
| $R_b$ ( $\Omega$ )    | 4629                   | 4034                   |
| $W_o$ ( $\Omega$ )    | 0.008                  | 0.006                  |

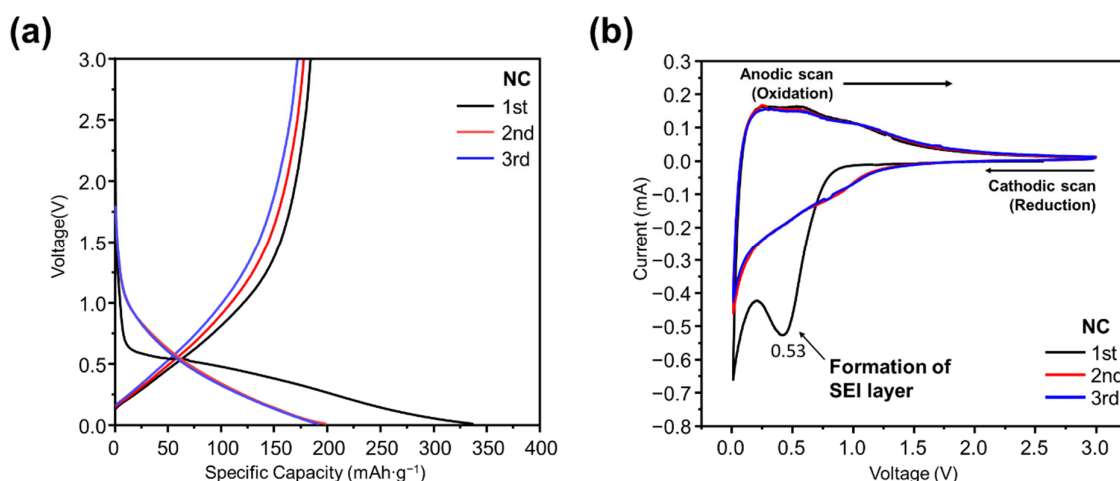

**Figure S1.** (a) Discharge-charge voltage profiles of the first three cycles at 0.2 Ag<sup>-1</sup> and (b) CV curve at a scan rate of 0.1 mVs<sup>-1</sup> from NC sample in the voltage range of 0.01–3.0 V.

## References

1. Liu, X.; Zhang, J.; Guo, S.; Pinna, N. Graphene/N-doped carbon sandwiched nanosheets with ultrahigh nitrogen doping for boosting lithium-ion batteries. *J. Mater. Chem. A* **2016**, *4*, 1423–1431.
2. Guo, J.; Liu, J.; Dai, H.; Zhou, R.; Wang, T.; Zhang, C.; Ding, S.; Wang, H. Nitrogen doped carbon nanofiber derived from polypyrrole functionalized polyacrylonitrile for applications in lithium-ion batteries and oxygen reduction reaction. *J. Colloid Interface Sci.* **2017**, *507*, 154–161.
3. Ye, G.; Zhu, X.; Chen, S.; Li, D.; Yin, Y.; Lu, Y.; Komarneni, S.; Yang, D. Nanoscale engineering of nitrogen-doped carbon nanofiber aerogels for enhanced lithium ion storage. *J. Mater. Chem. A* **2017**, *5*, 8247–8254, doi:10.1039/c7ta02334k.
4. Tian, L.-L.; Li, S.-B.; Zhang, M.-J.; Li, S.-K.; Lin, L.-P.; Zheng, J.-X.; Zhuang, Q.-C.; Amine, K.; Pan, F. Cascading Boost Effect on the Capacity of Nitrogen-Doped Graphene Sheets for Li- and Na-Ion Batteries. *ACS Appl. Mater. Interfaces* **2016**, *8*, 26722–26729, doi:10.1021/acsami.6b07390.
5. Sun, Z.; Li, K.; Wee Koh, S.; Jiao, L. Low-Cost and scalable fabrication of hierarchically porous N-doped carbon for energy storage and conversion application. *ChemistrySelect* **2020**, *5*, 533–537.
6. Zheng, X.; Jiang, K.; Zhang, L.; Wang, C. N-doped 3D porous carbon materials derived from hierarchical porous IRMOF-3 using a citric acid modulator: Fabrication and application in lithium ion batteries as anode materials. *Dal-ton Trans.* **2020**, *49*, 9369–9376.
7. Zhang, J.; Zhang, L.; Yang, S.; Li, D.; Xie, Z.; Wang, B.; Xia, Y.; Quan, F. Facile strategy to produce N-doped carbon aerogels derived from seaweed for lithium-ion battery anode. *J. Alloys Compd.* **2017**, *701*, 256–261.
8. Shan, C.; Wang, Y.; Xie, S.; Guan, H.Y.; Argueta, M.; Yue, Y. Free-standing nitrogen-doped graphene-carbon nano-fiber composite mats: Electrospinning synthesis and application as anode material for lithium-ion batteries. *J. Chem. Technol. Biotechnol.* **2019**, *94*, 3793–3799.
9. Ou, J.; Zhang, Y.; Chen, L.; Zhao, Q.; Meng, Y.; Guo, Y.; Xiao, D. Nitrogen-rich porous carbon derived from biomass as a high performance anode material for lithium ion batteries. *J. Mater. Chem. A* **2015**, *3*, 6534–6541, doi:10.1039/c4ta06614f.
